# Supplementary figures and images for: Endocannabinoid signaling enhances visual responses through modulation of intracellular chloride levels in retinal ganglion cells
Source: eLife journal article supplement (doi:10.7554/elife.15932), 2016-08-08

# Figure 1 - figure supplement 1

a

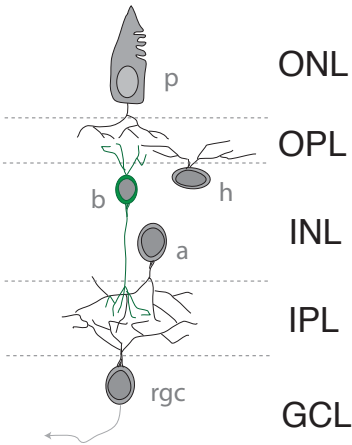

b

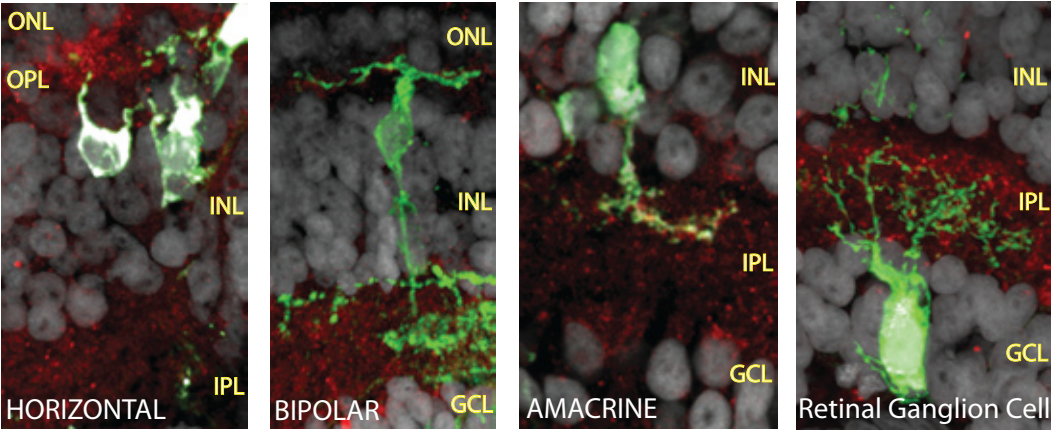

Supplement: supp [file elife_poa_e15932_Figure_1_figure_supplement_1.pdf › elife_poa_e15932_Figure_1_figure_supplement_1.pdf]

Figure 2 - figure supplement 1

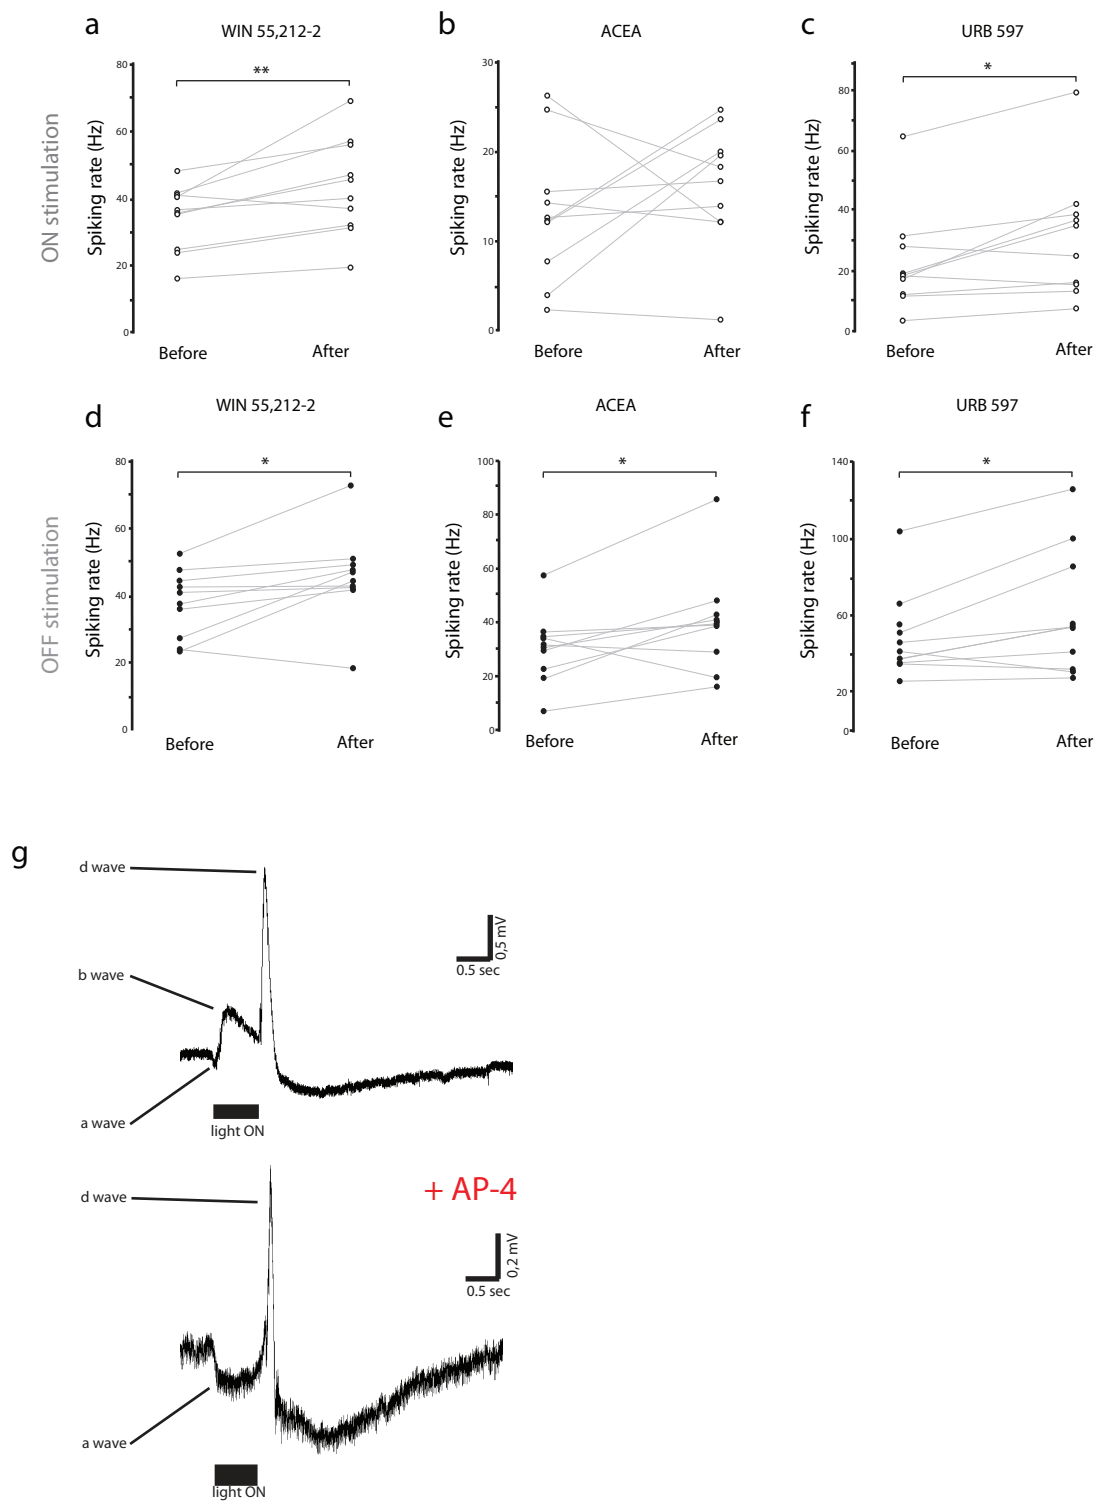

Supplement: supp [file elife_poa_e15932_Figure_2_figure_supplement_1.pdf › elife_poa_e15932_Figure_2_figure_supplement_1.pdf]

# Figure 4- figure supplement 1

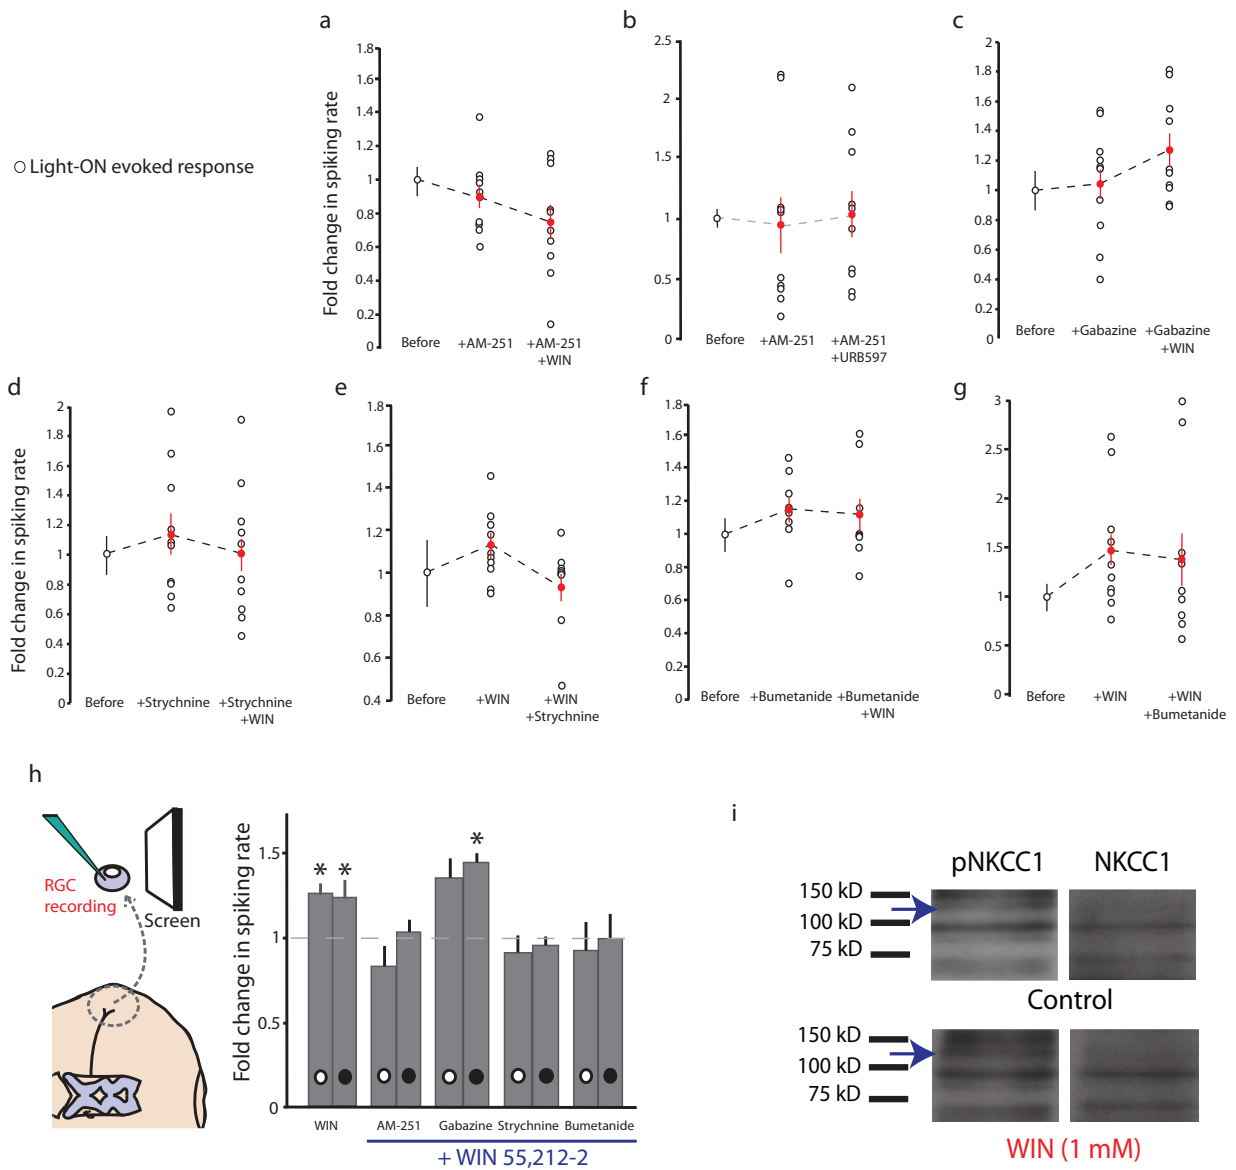

Supplement: supp [file elife_poa_e15932_Figure_4_figure_supplement_1.pdf › elife_poa_e15932_Figure_4_figure_supplement_1.pdf]

# Figure 8 - figure supplement 1

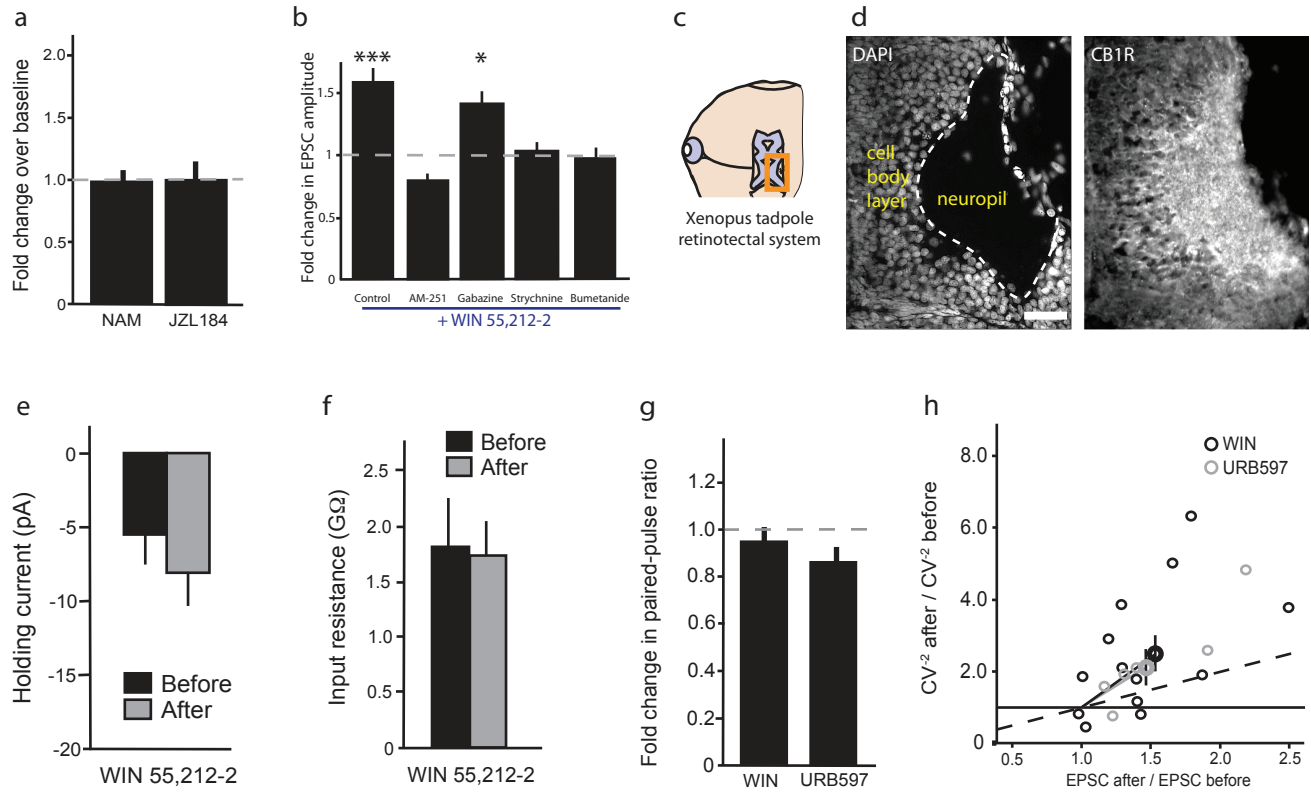

Supplement: supp [file elife_poa_e15932_Figure_8_figure_supplement_1.pdf › elife_poa_e15932_Figure_8_figure_supplement_1.pdf]
